# Supplementary material
Source: PubMed Central journal article supplement (PMC8020695)
Supplement: jcsm.9044.ds001.pdf [file jcsm.9044.ds001.pdf]

|           | Other fields |        |      |          |           |       |        |         | Sleep - Corrected |      |          |           |       |        |           |        | Cardiology |        | Neurology |       | ORL       |        | Pulmonology |        | Psychiatry |        | Pediatrics |       | Sleep |  |
|-----------|--------------|--------|------|----------|-----------|-------|--------|---------|-------------------|------|----------|-----------|-------|--------|-----------|--------|------------|--------|-----------|-------|-----------|--------|-------------|--------|------------|--------|------------|-------|-------|--|
|           | #total       | #MA    | %    | GR-Total | GR%-Total | GR-MA | GR%-MA | #total  | #MA               | %    | GR-Total | GR%-Total | GR-MA | GR%-MA | #total    | #MA    | #total     | #MA    | #total    | #MA   | #total    | #MA    | #total      | #MA    | #total     | #MA    | #total     | #MA   |       |  |
| Média     | 250,464      | 1,143  | 0    | 10,213   | 6         | 168   | 12     | 3,498   | 15                | 0    | 278      | 9         | 3     | 14     |           |        |            |        |           |       |           |        |             |        |            |        |            |       |       |  |
| 2015-2019 | 726,816      | 10,151 | 1.40 | 20,333   | 3.40      | 1,229 | 14.37  | 19,032  | 165               | 0.86 | 1,293    | 7.83      | 32    | 27.45  |           |        |            |        |           |       |           |        |             |        |            |        |            |       |       |  |
| 2010-2014 | 631,198      | 4,363  | 0.68 | 23,239   | 3.87      | 902   | 26.92  | 12,086  | 45                | 0.36 | 977      | 8.72      | 11    | 34.44  |           |        |            |        |           |       |           |        |             |        |            |        |            |       |       |  |
| 2005-2009 | 502,883      | 1,484  | 0.29 | 27,746   | 5.86      | 226   | 18.46  | 7,955   | 12                | 0.15 | 826      | 12.10     | 3     | 40.48  |           |        |            |        |           |       |           |        |             |        |            |        |            |       |       |  |
| 2000-2004 | 369,729      | 603    | 0.16 | 17,081   | 4.72      | 85    | 15.35  | 4,307   | 5                 | 0.11 | 456      | 11.68     | 1     | 47.50  |           |        |            |        |           |       |           |        |             |        |            |        |            |       |       |  |
| 1995-1999 | 329,926      | 340    | 0.10 | 291      | 0.18      | 39    | 13.93  | 2,619   | 2                 | 0.08 | 232      | 9.81      | 0     | 9.33   |           |        |            |        |           |       |           |        |             |        |            |        |            |       |       |  |
| 1990-1994 | 302,811      | 151    | 0.05 | 14,618   | 5.12      | 29    | 24.68  | 1,801   | 1                 | 0.06 | 113      | 7.23      | 0     | 44.00  |           |        |            |        |           |       |           |        |             |        |            |        |            |       |       |  |
| 1985-1999 | 264,493      | 43     | 0    | 7,076    | 3         | 15    | 65     | 1,350   | 0                 | 0    | 29       | 2         | 0     | 0      |           |        |            |        |           |       |           |        |             |        |            |        |            |       |       |  |
| 1980-1984 | 211,558      | 10     | 0    | 8,704    | 5         | 2     | 0      | 1,141   | 0                 | 0    | 59       | 6         | 0     | 0      |           |        |            |        |           |       |           |        |             |        |            |        |            |       |       |  |
| 1975-1979 | 160,536      | 0      | 0    | 8,139    | 5         | 0     | 0      | 864     | 0                 | 0    | 48       | 6         | 0     | 0      |           |        |            |        |           |       |           |        |             |        |            |        |            |       |       |  |
| 1970-1974 | 113,978      | 0      | 0    | 9,957    | 9         | 0     | 0      | 614     | 0                 | 0    | 36       | 7         | 0     | 0      |           |        |            |        |           |       |           |        |             |        |            |        |            |       |       |  |
| 1965-1969 | 68,297       | 0      | 0    | 9,677    | 16        | 0     | 0      | 405     | 0                 | 0    | 58       | 17        | 0     | 0      |           |        |            |        |           |       |           |        |             |        |            |        |            |       |       |  |
| 1960-1964 | 31,635       | 0      | 0    | 4,917    | 19        | 0     | 0      | 152     | 0                 | 0    | 34       | 27        | 0     | 0      |           |        |            |        |           |       |           |        |             |        |            |        |            |       |       |  |
| 1955-1959 | 17,594       | 0      | 0    | 501      | 3         | 0     | 0      | 65      | 0                 | 0    | 5        | 9         | 0     | 0      |           |        |            |        |           |       |           |        |             |        |            |        |            |       |       |  |
| 1950-1954 | 15,985       | 0      | 0    | 917      | 6         | 0     | 0      | 53      | 0                 | 0    | 2        | 4         | 0     | 0      |           |        |            |        |           |       |           |        |             |        |            |        |            |       |       |  |
| 1945-1949 | 9,525        | 0      | 0    | 0        | 0         | 0     | 0      | 34      | 0                 | 0    | 0        | 0         | 0     | 0      |           |        |            |        |           |       |           |        |             |        |            |        |            |       |       |  |
| TOTAL     | 18,784,820   | 85,718 | 0.46 |          |           |       |        | 262,384 | 1,152             | 0.44 |          |           |       |        | 5,311,343 | 25,750 | 5,813,218  | 21,827 | 468,739   | 1,940 | 2,272,529 | 14,093 | 1,762,966   | 11,913 | 3,156,025  | 10,195 | 403,668    | 1,773 |       |  |
| 2019      | 778,566      | 12,637 | 1.62 | 9,478    | 1.23      | 1,523 | 13.70  | 20,885  | 229               | 1.10 | -11      | -0.05     | 44    | 23.94  | 179,610   | 3,551  | 242,294    | 3,450  | 19,489    | 345   | 115,058   | 1,911  | 88,818      | 1,808  | 133,297    | 1,572  | 32,130     | 352   |       |  |
| 2018      | 769,088      | 11,114 | 1.45 | 130,997  | 20.53     | 1,276 | 12.97  | 20,896  | 185               | 0.88 | 944      | 4.73      | 15    | 8.81   | 182,721   | 3,222  | 233,015    | 3,005  | 18,708    | 227   | 115,356   | 1,750  | 81,323      | 1,560  | 137,965    | 1,350  | 32,147     | 284   |       |  |
| 2017      | 638,091      | 9,838  | 1.54 | -96,884  | -13.18    | 666   | 7.26   | 19,952  | 170               | 0.85 | 2,037    | 11.37     | 33    | 24.29  | 176,185   | 2,909  | 226,905    | 2,651  | 17,776    | 237   | 11,731    | 1,618  | 76,725      | 1,298  | 128,769    | 1,125  | 30,695     | 261   |       |  |
| 2016      | 734,975      | 9,172  | 1.25 | 21,613   | 3.03      | 1,178 | 14.74  | 17,915  | 137               | 0.76 | 2,402    | 15.49     | 29    | 26.51  | 178,666   | 2,760  | 224,964    | 2,379  | 17,904    | 208   | 108,629   | 1,594  | 76,456      | 1,228  | 128,356    | 1,003  | 27,561     | 210   |       |  |
| 2015      | 713,362      | 7,994  | 1.12 | 36,459   | 5.39      | 1,503 | 23.16  | 15,512  | 108               | 0.70 | 1,095    | 7.59      | 38    | 53.70  | 174,366   | 2,478  | 215,118    | 1,983  | 17,761    | 197   | 105,051   | 1,406  | 74,301      | 965    | 126,765    | 965    | 23,865     | 166   |       |  |
| 2014      | 676,903      | 6,491  | 0.96 | 2,322    | 0.34      | 1,007 | 18.36  | 14,418  | 70                | 0.49 | 1,190    | 9.00      | 12    | 20.00  | 164,307   | 2,034  | 207,851    | 1,580  | 16,727    | 140   | 98,458    | 1,186  | 70,520      | 841    | 119,040    | 710    | 22,181     | 108   |       |  |
| 2013      | 674,581      | 5,484  | 0.81 | 51,777   | 8.31      | 1,419 | 34.91  | 13,228  | 59                | 0.44 | 959      | 7.81      | 12    | 26.76  | 168,128   | 1,790  | 204,865    | 1,325  | 16,410    | 115   | 100,210   | 1,018  | 68,833      | 676    | 116,135    | 560    | 20,350     | 90    |       |  |
| 2012      | 622,804      | 4,065  | 0.65 | 21,570   | 3.59      | 877   | 27.51  | 12,269  | 46                | 0.38 | 1,781    | 16.98     | 21    | 82.05  | 150,972   | 1,237  | 193,510    | 979    | 16,083    | 79    | 86,564    | 722    | 66,103      | 597    | 109,572    | 451    | 18,875     | 71    |       |  |
| 2011      | 601,234      | 3,188  | 0.53 | 20,767   | 3.58      | 603   | 23.33  | 10,488  | 25                | 0.24 | 458      | 4.57      | 1     | 2.63   | 149,421   | 994    | 181,063    | 701    | 15,286    | 74    | 86,670    | 578    | 61,821      | 438    | 106,973    | 403    | 16,135     | 39    |       |  |
| 2010      | 580,467      | 2,585  | 0.45 | 19,760   | 3.52      | 604   | 30.49  | 10,030  | 25                | 0.25 | 499      | 5.23      | 7     | 40.74  | 146,355   | 790    | 178,044    | 602    | 14,597    | 45    | 80,375    | 447    | 57,673      | 380    | 103,423    | 321    | 15,430     | 38    |       |  |
| 2009      | 560,707      | 1,981  | 0.35 | 38,205   | 7.31      | 249   | 14.38  | 9,531   | 18                | 0.18 | 694      | 7.86      | 7     | 58.82  | 145,465   | 635    | 173,878    | 470    | 13,931    | 45    | 77,418    | 256    | 54,075      | 307    | 95,940     | 268    | 14,663     | 27    |       |  |
| 2008      | 522,502      | 1,732  | 0.33 | 22,050   | 4.41      | 233   | 15.54  | 8,837   | 11                | 0.13 | 1,020    | 13.05     | -3    | -22.73 | 139,879   | 552    | 164,344    | 408    | 12,608    | 35    | 65,262    | 277    | 51,751      | 261    | 88,658     | 199    | 13,595     | 17    |       |  |
| 2007      | 500,452      | 1,499  | 0.30 | 21,435   | 4.47      | 292   | 24.19  | 7,817   | 14                | 0.18 | 676      | 9.47      | 4     | 37.50  | 136,162   | 492    | 154,432    | 329    | 12,070    | 25    | 64,674    | 251    | 48,415      | 239    | 84,699     | 163    | 12,026     | 22    |       |  |
| 2006      | 479,017      | 1,207  | 0.25 | 27,282   | 6.04      | 205   | 20.46  | 7,141   | 10                | 0.15 | 694      | 10.76     | 3     | 45.45  | 132,705   | 399    | 153,110    | 264    | 11,070    | 32    | 60,546    | 189    | 45,931      | 182    | 75,655     | 141    | 10,986     | 16    |       |  |
| 2005      | 451,735      | 1,002  | 0.22 | 29,760   | 7.05      | 151   | 17.74  | 6,447   | 7                 | 0.11 | 1,047    | 19.39     | 3     | 83.33  | 122,076   | 291    | 145,607    | 266    | 11,007    | 21    | 57,601    | 134    | 44,467      | 166    | 70,977     | 124    | 9,919      | 11    |       |  |
| 2004      | 421,975      | 851    | 0.20 | 47,486   | 12.68     | 152   | 21.75  | 5,400   | 4                 | 0.07 | 786      | 17.03     | -1    | -14.29 | 110,565   | 272    | 139,710    | 206    | 10,057    | 16    | 51,019    | 115    | 43,117      | 140    | 67,507     | 102    | 8,308      | 6     |       |  |
| 2003      | 374,489      | 699    | 0.19 | 15,000   | 4.17      | 113   | 19.28  | 4,614   | 5                 | 0.10 | 417      | 9.94      | -1    | -12.50 | 104,025   | 210    | 116,392    | 166    | 9,384     | 5     | 47,581    | 105    | 34,574      | 130    | 62,533     | 83     | 7,099      | 7     |       |  |
| 2002      | 359,489      | 586    | 0.16 | 15,327   | 4.45      | 133   | 29.36  | 4,197   | 5                 | 0.12 | 259      | 6.57      | 1     | 14.29  | 96,353    | 161    | 115,579    | 160    | 9,201     | 9     | 45,233    | 77     | 34,135      | 97     | 58,988     | 82     | 6,457      | 8     |       |  |
| 2001      | 344,162      | 453    | 0.13 | -4,370   | -1.25     | 294   | 6.84   | 3,938   | 5                 | 0.12 | 554      | 16.38     | 0     | 0.00   | 95,212    | 123    | 110,799    | 113    | 8,964     | 9     | 44,428    | 66     | 29,535      | 79     | 55,224     | 63     | 6,059      | 7     |       |  |
| 2000      | 348,532      | 424    | 0.12 | 11,962   | 3.55      | -2    | -0.47  | 3,384   | 5                 | 0.13 | 264      | 8.46      | 3     | 250.00 | 93,602    | 123    | 113,143    | 97     | 9,338     | 15    | 43,941    | 73     | 31,348      | 61     | 57,160     | 55     | 5,206      | 7     |       |  |
| 1999      | 336,570      | 426    | 0.13 | 20,187   | 6.38      | 69    | 19.33  | 3,120   | 1                 | 0.04 | 347      | 12.52     | -1    | -50.00 | 88,647    | 112    | 107,176    | 91     | 8,435     | 13    | 47,729    | 72     | 28,750      | 64     | 55,833     | 74     | 4,800      | 2     |       |  |
| 1998      | 316,383      | 357    | 0.11 | -3,329   | -1.04     | 18    | 5.31   | 2,773   | 3                 | 0.09 | 268      | 10.72     | -1    | -20.00 | 85,941    | 89     | 103,342    | 96     | 8,429     | 8     | 41,156    | 44     | 25,604      | 57     | 51,911     | 63     | 4,266      | 4     |       |  |
| 1997      | 319,712      | 339    | 0.11 | -8,782   | -2.67     | 62    | 22.38  | 2,504   | 3                 | 0.13 | 38       | 1.53      | 1     | 66.67  | 100,235   | 84     | 100,966    | 91     | 8,121     | 13    | 33,755    | 36     | 26,979      | 58     | 49,656     | 57     | 3,853      | 5     |       |  |
| 1996      | 328,494      | 277    | 0.08 | -19,975  | -5.73     | -22   | -7.36  | 2,467   | 2                 | 0.08 | 234      | 10.48     | 1     | 50.00  | 103,709   | 84     | 105,628    | 65     | 8,775     | 8     | 33,201    | 36     | 26,343      | 34     | 50,838     | 50     | 3,795      | 3     |       |  |
| 1995      | 348,469      | 299    | 0.09 | 13,352   | 3.98      | 69    | 30.00  | 2,233   | 1                 | 0.06 | 271      | 13.82     | 0     | 0.00   | 115,561   | 75     | 113,569    | 83     | 7,594     | 2     | 33,397    | 30     | 26,976      | 59     | 51,372     | 50     | 3,435      | 2     |       |  |
| 1994      | 335,117      | 230    | 0.07 | 18,443   | 5.82      | 78    | 51.32  | 1,962   | 1                 | 0.07 | -74      | -3.64     | 1     | 100.00 | 114,999   | 72     | 106,518    | 63     | 7,369     | 4     | 32,168    | 28     | 24,179      | 33     | 49,884     | 30     | 3,018      | 2     |       |  |
| 1993      | 316,674      | 152    | 0.05 | 28,528   | 9.90      | -7    | -4.40  | 2,036   | 1                 | 0.03 | 265      | 14.98     | -3    | -80.00 | 110,703   | 41     | 97,145     | 41     | 7,008     | 3     | 33,348    | 16     | 22,612      | 26     | 45,858     | 25     | 3,132      | 1     |       |  |
| 19        |              |        |      |          |           |       |        |         |                   |      |          |           |       |        |           |        |            |        |           |       |           |        |             |        |            |        |            |       |       |  |

|      |        |   |      |        |        |       |         |     |   |      |       |        |       |         |        |        |       |       |       |        |     |
|------|--------|---|------|--------|--------|-------|---------|-----|---|------|-------|--------|-------|---------|--------|--------|-------|-------|-------|--------|-----|
| 1967 | 63,446 | 0 | 0.00 | 8,067  | 14.57  | 0     | #DIV/0! | 391 | 0 | 0.00 | 56    | 16.67  | 0     | #DIV/0! | 16,935 | 17,462 | 1,941 | 7,164 | 7,197 | 12,747 | 602 |
| 1966 | 55,379 | 0 | 0.00 | 5,034  | 10.00  | 0     | #DIV/0! | 335 | 0 | 0.00 | 44    | 15.18  | 0     | #DIV/0! | 14,159 | 15,177 | 1,886 | 6,085 | 6,456 | 11,616 | 516 |
| 1965 | 50,345 | 0 | 0.00 | 6,086  | 13.75  | 0     | #DIV/0! | 291 | 0 | 0.00 | 46    | 18.83  | 0     | #DIV/0! | 12,333 | 13,770 | 2,028 | 5,921 | 6,277 | 10,016 | 448 |
| 1964 | 44,259 | 0 | 0.00 | 9,930  | 28.93  | 0     | #DIV/0! | 245 | 0 | 0.00 | 66    | 37.09  | 0     | #DIV/0! | 12,291 | 12,807 | 1,324 | 5,384 | 4,969 | 7,484  | 377 |
| 1963 | 34,329 | 0 | 0.00 | 5,783  | 20.26  | 0     | #DIV/0! | 179 | 0 | 0.00 | 38    | 27.31  | 0     | #DIV/0! | 9,971  | 9,739  | 945   | 4,007 | 4,729 | 4,938  | 275 |
| 1962 | 28,546 | 0 | 0.00 | -1,023 | -3.46  | 0     | #DIV/0! | 140 | 0 | 0.00 | 28    | 24.86  | 0     | #DIV/0! | 8,583  | 8,273  | 692   | 3,205 | 4,337 | 3,456  | 216 |
| 1961 | 29,569 | 0 | 0.00 | 8,097  | 37.71  | 0     | #DIV/0! | 112 | 0 | 0.00 | 30    | 36.22  | 0     | #DIV/0! | 8,456  | 8,640  | 703   | 3,295 | 5,007 | 3,468  | 173 |
| 1960 | 21,472 | 0 | 0.00 | 1,799  | 9.14   | 0     | #DIV/0! | 83  | 0 | 0.00 | 6     | 7.63   | 0     | #DIV/0! | 6,335  | 6,032  | 461   | 2,374 | 3,912 | 2,358  | 127 |
| 1959 | 19,673 | 0 | 0.00 | 607    | 3.18   | 0     | #DIV/0! | 77  | 0 | 0.00 | 10    | 15.69  | 0     | #DIV/0! | 5,609  | 5,736  | 456   | 2,364 | 3,353 | 2,155  | 118 |
| 1958 | 19,066 | 0 | 0.00 | 1,185  | 6.63   | 0     | #DIV/0! | 66  | 0 | 0.00 | -7    | -9.73  | 0     | #DIV/0! | 5,455  | 5,494  | 466   | 2,338 | 3,218 | 2,095  | 102 |
| 1957 | 17,881 | 0 | 0.00 | 1,843  | 11.49  | 0     | #DIV/0! | 73  | 0 | 0.00 | 18    | 32.94  | 0     | #DIV/0! | 4,900  | 5,268  | 421   | 2,154 | 3,077 | 2,061  | 113 |
| 1956 | 16,038 | 0 | 0.00 | 725    | 4.73   | 0     | #DIV/0! | 55  | 0 | 0.00 | 4     | 7.59   | 0     | #DIV/0! | 4,460  | 4,778  | 426   | 1,967 | 2,695 | 1,712  | 85  |
| 1955 | 15,313 | 0 | 0.00 | -1,854 | -10.80 | 0     | #DIV/0! | 51  | 0 | 0.00 | -1    | -1.25  | 0     | #DIV/0! | 4,461  | 4,712  | 463   | 2,032 | 1,916 | 1,729  | 79  |
| 1954 | 17,167 | 0 | 0.00 | 156    | 0.92   | 0     | #DIV/0! | 52  | 0 | 0.00 | -7    | -12.09 | 0     | #DIV/0! | 4,563  | 5,557  | 752   | 2,445 | 2,122 | 1,728  | 80  |
| 1953 | 17,011 | 0 | 0.00 | 678    | 4.15   | 0     | #DIV/0! | 59  | 0 | 0.00 | 5     | 9.64   | 0     | #DIV/0! | 4,570  | 5,784  | 779   | 2,229 | 2,137 | 1,512  | 91  |
| 1952 | 16,333 | 0 | 0.00 | 986    | 6.42   | 0     | #DIV/0! | 54  | 0 | 0.00 | 1     | 1.22   | 0     | #DIV/0! | 4,490  | 5,245  | 699   | 2,199 | 2,054 | 1,646  | 83  |
| 1951 | 15,347 | 0 | 0.00 | 1,282  | 9.11   | 0     | #DIV/0! | 53  | 0 | 0.00 | 7     | 15.49  | 0     | #DIV/0! | 4,137  | 5,011  | 755   | 2,077 | 2,045 | 1,322  | 82  |
| 1950 | 14,065 | 0 | 0.00 | 1,482  | 11.78  | 0     | #DIV/0! | 46  | 0 | 0.00 | 3     | 7.58   | 0     | #DIV/0! | 3,705  | 4,371  | 616   | 1,905 | 2,045 | 1,423  | 71  |
| 1949 | 12,583 | 0 | 0.00 | 808    | 6.86   | 0     | #DIV/0! | 43  | 0 | 0.00 | 10    | 29.41  | 0     | #DIV/0! | 3,139  | 3,979  | 613   | 1,748 | 1,830 | 1,274  | 66  |
| 1948 | 11,775 | 0 | 0.00 | 1,120  | 10.51  | 0     | #DIV/0! | 33  | 0 | 0.00 | 5     | 15.91  | 0     | #DIV/0! | 2,925  | 3,547  | 676   | 1,662 | 1,627 | 1,338  | 51  |
| 1947 | 10,655 | 0 | 0.00 | 2,422  | 29.42  | 0     | #DIV/0! | 29  | 0 | 0.00 | -6    | -16.98 | 0     | #DIV/0! | 2,572  | 3,445  | 633   | 1,560 | 1,585 | 860    | 44  |
| 1946 | 8,233  | 0 | 0.00 | 3,852  | 87.93  | 0     | #DIV/0! | 34  | 0 | 0.00 | 5     | 17.78  | 0     | #DIV/0! | 1814   | 2659   | 457   | 1249  | 1331  | 723    | 53  |
| 1945 | 4,381  | 0 | 0.00 | #REF!  | #REF!  | #REF! | #REF!   | 29  | 0 | 0.00 | #REF! | #REF!  | #REF! | #REF!   | 959    | 1088   | 366   | 483   | 1091  | 394    | 45  |
